# Supplementary material for: A systematic review of impact of person-centred interventions for serious physical illness in terms of outcomes and costs
Source: HighWire-hosted journal article supplement (doi:10.1136/bmjopen-2021-054386), 2022-07-01
Supplement: bmjopen-2021-054386supp001_data_supplement.pdf [file bmjopen-2021-054386supp001_data_supplement.pdf]

**Supplementary file 1: Searches conducted in electronic databases****Embase Classic+Embase <1947 to 2022 April 08>**

- 1 (patient centred care or patient focused care or person centred care or person focused care or family centred care or family focused care or individualised care or individualized care or holistic care).mp. [mp=title, abstract, heading word, drug trade name, original title, device manufacturer, drug manufacturer, device trade name, keyword heading word, floating subheading word, candidate term word] 15839
- 2 limit 1 to yr="2020 -Current" 3865
- 3 (serious illness\$ or serious illness or chronic disease or chronic illness\$ or chronic illness or long term conditions or life limiting illness\$ or life threatening illness\$).mp. [mp=title, abstract, heading word, drug trade name, original title, device manufacturer, drug manufacturer, device trade name, keyword heading word, floating subheading word, candidate term word] 267608
- 4 limit 3 to yr="2020 -Current" 28132
- 5 2 and 4= 208

<https://access.ovid.com/custom/redirector/wayfless.html?idp=https://kclidpdev.kcl.ac.uk/idp/shibboleth&url=http://ovidsp.ovid.com/ovidweb.cgi?T=JS&NEWS=N&PAGE=main&SHAREDSEARCHID=28YQbqmYyLtlarRwfTMEDazD3SF1RTirGR7GVD1pZwebUiJijdYVVfOGwyYvC4Q9F>

**Ovid MEDLINE(R) ALL <1946 to April 08, 2022>**

- 1 (patient centred care or patient focused care or person centred care or person focused care or family centred care or family focused care or individualised care or individualized care or holistic care).mp. [mp=title, abstract, original title, name of substance word, subject heading word, floating sub-heading word, keyword heading word, organism supplementary concept word, protocol supplementary concept word, rare disease supplementary concept word, unique identifier, synonyms] 9843
- 2 limit 1 to yr="2022 -Current" 463
- 3 (serious illness\$ or serious illness or chronic disease or chronic illness\$ or chronic illness or long term conditions or life limiting illness\$ or life threatening illness\$).mp. [mp=title, abstract, original title, name of substance word, subject heading word, floating sub-heading word, keyword heading word, organism supplementary concept word, protocol supplementary concept word, rare disease supplementary concept word, unique identifier, synonyms] 323614
- 4 limit 3 to yr="2020 -Current" 22416
- 5 2 and 4= 21

<https://access.ovid.com/custom/redirector/wayfless.html?idp=https://kclidpdev.kcl.ac.uk/idp/shibboleth&url=http://ovidsp.ovid.com/ovidweb.cgi?T=JS&NEWS=N&PAGE=main&SHAREDSEARCHID=3k81aYpUq8d9oWXfG0tpLyxhYNYL4I8uKFDxDdUBPLBxl0VFpcFdxjgQG9nGHILT>

**AMED (Allied and Complementary Medicine) <1985 to April 2022>**

|    |                                                |      |  |
|----|------------------------------------------------|------|--|
| 1  | patient centred care.mp.                       | 76   |  |
| 2  | limit 1 to yr="2020 -Current"                  | 7    |  |
| 3  | patient focused care.mp.                       | 15   |  |
| 4  | limit 3 to yr="2020 -Current"                  | 0    |  |
| 5  | person centred care.mp.                        | 37   |  |
| 6  | limit 5 to yr="2020 -Current"                  | 4    |  |
| 7  | person focused care.mp.                        | 1    |  |
| 8  | limit 7 to yr="2020 -Current"                  | 0    |  |
| 9  | family centred care.mp.                        | 35   |  |
| 10 | limit 9 to yr="2020 -Current"                  | 3    |  |
| 11 | family focused care.mp.                        | 2    |  |
| 12 | limit 11 to yr="2020 -Current"                 | 0    |  |
| 13 | family focused care.mp.                        | 2    |  |
| 14 | individualised care.mp.                        | 10   |  |
| 15 | limit 14 to yr="2020 -Current"                 | 0    |  |
| 16 | individualized care.mp.                        | 39   |  |
| 17 | limit 16 to yr="2020 -Current"                 | 6    |  |
| 18 | holistic care.mp.                              | 198  |  |
| 19 | limit 18 to yr="2020 -Current"                 | 10   |  |
| 20 | 2 or 4 or 6 or 8 or 10 or 13 or 15 or 17 or 19 | 30   |  |
| 21 | serious illness\$.mp.                          | 18   |  |
| 22 | limit 21 to yr="2020 -Current"                 | 1    |  |
| 23 | chronic illness\$.mp.                          | 184  |  |
| 24 | limit 23 to yr="2020 -Current"                 | 8    |  |
| 25 | chronic disease\$.mp.                          | 8168 |  |
| 26 | limit 25 to yr="2020 -Current"                 | 449  |  |
| 27 | life limiting condition\$.mp.                  | 67   |  |
| 28 | limit 27 to yr="2020 -Current"                 | 2    |  |
| 29 | long term condition\$.mp.                      | 103  |  |
| 30 | limit 29 to yr="2020 -Current"                 | 4    |  |
| 31 | 22 or 24 or 26 or 28 or 30                     | 461  |  |
| 32 | 20 and 31                                      | 3    |  |

<https://access.ovid.com/custom/redirector/wayfless.html?idp=https://kclidpdev.kcl.ac.uk/idp/shibboleth&url=http://ovidsp.ovid.com/ovidweb.cgi?T=JS&NEWS=N&PAGE=main&SHAREDSEARCHID=5GZpoqjqkWOmUgtn9svLWQBU36eWXerU3Fd7QGdHRVZTQBRzrvXtT9tbtNMREBzMp>

**APA PsycInfo <1806 to April Week 1 2022>**

- 1 (patient centred care or patient focused care or person centred care or person focused care or family centred care or family focused care or individualised care or individualized care or holistic care).mp. [mp=title, abstract, heading word, table of contents, key concepts, original title, tests & measures, mesh word] 3321
- 2 limit 1 to yr="2020 -Current" 699
- 3 (serious illness\$ or serious illness or chronic disease or chronic illness\$ or chronic illness or long term conditions or life limiting illness\$ or life threatening illness\$).mp. [mp=title, abstract, heading word, table of contents, key concepts, original title, tests & measures, mesh word] 45885
- 4 limit 3 to yr="2020 -Current" 2633
- 5 2 and 4= 32

<https://access.ovid.com/custom/redirector/wayfless.html?idp=https://kclidpdev.kcl.ac.uk/idp/shibboleth&url=http://ovidsp.ovid.com/ovidweb.cgi?T=JS&NEWS=N&PAGE=main&SHAREDSEARCHID=HpRfZ61FWxXJBuPHZcLgIO4z1gqDLHbl79dpT2rMPZwi5gtxtwDxWaR3c9OQEHek>

4/30/22, 5:12 PM

Print Search History: EBSCOhost

MY

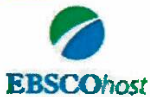

Saturday, April 30, 2022 4:12:13 PM

| #   | Query                                         | Limiters/Expanders                                                     | Last Run Via                                                                                        | Results |
|-----|-----------------------------------------------|------------------------------------------------------------------------|-----------------------------------------------------------------------------------------------------|---------|
| S22 | S13 AND S21                                   | Expanders - Apply equivalent subjects<br>Search modes - Boolean/Phrase | Interface - EBSCOhost<br>Research Databases<br>Search Screen - Advanced Search<br>Database - CINAHL | 303     |
| S21 | S14 OR S15 OR S16 OR S17 OR S18 OR S19 OR S20 | Expanders - Apply equivalent subjects<br>Search modes - Boolean/Phrase | Interface - EBSCOhost<br>Research Databases<br>Search Screen - Advanced Search<br>Database - CINAHL | 87,551  |
| S20 | "long term conditions"                        | Expanders - Apply equivalent subjects<br>Search modes - Boolean/Phrase | Interface - EBSCOhost<br>Research Databases<br>Search Screen - Advanced Search<br>Database - CINAHL | 1,903   |
| S19 | "long term condition\$"                       | Expanders - Apply equivalent subjects<br>Search modes - Boolean/Phrase | Interface - EBSCOhost<br>Research Databases<br>Search Screen - Advanced Search<br>Database - CINAHL | 467     |
| S18 | "serious illness"                             | Expanders - Apply equivalent subjects<br>Search modes - Boolean/Phrase | Interface - EBSCOhost<br>Research Databases<br>Search Screen - Advanced Search<br>Database - CINAHL | 1,987   |
| S17 | "serious illness\$"                           | Expanders - Apply equivalent subjects<br>Search modes - Boolean/Phrase | Interface - EBSCOhost<br>Research Databases<br>Search Screen - Advanced Search<br>Database - CINAHL | 0       |
| S16 | "chronic illness"                             | Expanders - Apply equivalent subjects<br>Search modes - Boolean/Phrase | Interface - EBSCOhost<br>Research Databases<br>Search Screen - Advanced Search<br>Database - CINAHL | 29,877  |
| S15 | "chronic illness\$"                           | Expanders - Apply equivalent subjects                                  | Interface - EBSCOhost<br>Research Databases                                                         | 2       |

<https://web.s.ebscohost.com/ehost/searchhistory/PrintSearchHistory?sid=262c81b0-ab7a-4673-a0e8-4be587323135%40redis&vid=33&History/te...> 1/4

4/30/22, 5:12 PM

Print Search History: EBSCOhost

|     |                                                                                  | Search modes -<br>Boolean/Phrase                                                                                                    | Search Screen - Advanced<br>Search<br>Database - CINAHL                                                |        |
|-----|----------------------------------------------------------------------------------|-------------------------------------------------------------------------------------------------------------------------------------|--------------------------------------------------------------------------------------------------------|--------|
| S14 | "chronic disease\$"                                                              | Expanders - Apply<br>equivalent subjects<br>Search modes -<br>Boolean/Phrase                                                        | Interface - EBSCOhost<br>Research Databases<br>Search Screen - Advanced<br>Search<br>Database - CINAHL | 79,620 |
| S13 | S1 OR S2 OR S3 OR S4<br>OR S5 OR S6 OR S7 OR<br>S8 OR S9 OR S10 OR<br>S11 OR S12 | Expanders - Apply<br>equivalent subjects<br>Search modes -<br>Boolean/Phrase                                                        | Interface - EBSCOhost<br>Research Databases<br>Search Screen - Advanced<br>Search<br>Database - CINAHL | 7,546  |
| S12 | "holistic care"                                                                  | Limiters - Published<br>Date: 20200101-<br>20220431<br>Expanders - Apply<br>equivalent subjects<br>Search modes -<br>Boolean/Phrase | Interface - EBSCOhost<br>Research Databases<br>Search Screen - Advanced<br>Search<br>Database - CINAHL | 983    |
| S11 | (MH "Holistic Care")                                                             | Limiters - Published<br>Date: 20200101-<br>20220431<br>Expanders - Apply<br>equivalent subjects<br>Search modes -<br>Boolean/Phrase | Interface - EBSCOhost<br>Research Databases<br>Search Screen - Advanced<br>Search<br>Database - CINAHL | 690    |
| S10 | "individualized care"                                                            | Limiters - Published<br>Date: 20200101-<br>20220431<br>Expanders - Apply<br>equivalent subjects<br>Search modes -<br>Boolean/Phrase | Interface - EBSCOhost<br>Research Databases<br>Search Screen - Advanced<br>Search<br>Database - CINAHL | 199    |
| S9  | "individualised care"                                                            | Limiters - Published<br>Date: 20200101-<br>20220431<br>Expanders - Apply<br>equivalent subjects<br>Search modes -<br>Boolean/Phrase | Interface - EBSCOhost<br>Research Databases<br>Search Screen - Advanced<br>Search<br>Database - CINAHL | 67     |
| S8  | "family focused care"                                                            | Limiters - Published<br>Date: 20200101-                                                                                             | Interface - EBSCOhost<br>Research Databases                                                            | 9      |

<https://web.s.ebscohost.com/ehost/searchhistory/PrintSearchHistory?sid=262c81b0-ab7a-4673-a0e8-4be587323135%40redis&vid=33&HistoryIte...> 2/4

4/30/22, 5:12 PM

Print Search History: EBSCOhost

|    |                                 |                                                                                                                                     |                                                                                                        |       |
|----|---------------------------------|-------------------------------------------------------------------------------------------------------------------------------------|--------------------------------------------------------------------------------------------------------|-------|
|    |                                 | 20220431<br>Expanders - Apply<br>equivalent subjects<br>Search modes -<br>Boolean/Phrase                                            | Search Screen - Advanced<br>Search<br>Database - CINAHL                                                |       |
| S7 | "family centered care"          | Limiters - Published<br>Date: 20200101-<br>20220431<br>Expanders - Apply<br>equivalent subjects<br>Search modes -<br>Boolean/Phrase | Interface - EBSCOhost<br>Research Databases<br>Search Screen - Advanced<br>Search<br>Database - CINAHL | 2,200 |
| S6 | (MH "Family Centered<br>Care")  | Limiters - Published<br>Date: 20200101-<br>20220431<br>Expanders - Apply<br>equivalent subjects<br>Search modes -<br>Boolean/Phrase | Interface - EBSCOhost<br>Research Databases<br>Search Screen - Advanced<br>Search<br>Database - CINAHL | 898   |
| S5 | (MH "Patient Centered<br>Care") | Limiters - Published<br>Date: 20200101-<br>20220431<br>Expanders - Apply<br>equivalent subjects<br>Search modes -<br>Boolean/Phrase | Interface - EBSCOhost<br>Research Databases<br>Search Screen - Advanced<br>Search<br>Database - CINAHL | 4,081 |
| S4 | "patient focused care"          | Limiters - Published<br>Date: 20200101-<br>20220431<br>Expanders - Apply<br>equivalent subjects<br>Search modes -<br>Boolean/Phrase | Interface - EBSCOhost<br>Research Databases<br>Search Screen - Advanced<br>Search<br>Database - CINAHL | 1,756 |
| S3 | "patient centred care"          | Limiters - Published<br>Date: 20200101-<br>20220431<br>Expanders - Apply<br>equivalent subjects<br>Search modes -<br>Boolean/Phrase | Interface - EBSCOhost<br>Research Databases<br>Search Screen - Advanced<br>Search<br>Database - CINAHL | 2,006 |
| S2 | "person focused care"           | Limiters - Published<br>Date: 20200101-<br>20220431<br>Expanders - Apply                                                            | Interface - EBSCOhost<br>Research Databases<br>Search Screen - Advanced                                | 4     |

<https://web.s.ebscohost.com/ehost/searchhistory/PrintSearchHistory?sid=262c81b0-ab7a-4673-a0e8-4be587323135%40redis&vid=33&HistoryIte...> 3/4

4/30/22, 5:12 PM

Print Search History: EBSCOhost

|    |                       |                      |                          |     |
|----|-----------------------|----------------------|--------------------------|-----|
|    |                       | equivalent subjects  | Search                   |     |
|    |                       | Search modes -       | Database - CINAHL        |     |
|    |                       | Boolean/Phrase       |                          |     |
| S1 | "person centred care" | Limiters - Published | Interface - EBSCOhost    | 453 |
|    |                       | Date: 20200101-      | Research Databases       |     |
|    |                       | 20220431             | Search Screen - Advanced |     |
|    |                       | Expanders - Apply    | Search                   |     |
|    |                       | equivalent subjects  | Database - CINAHL        |     |
|    |                       | Search modes -       |                          |     |
|    |                       | Boolean/Phrase       |                          |     |
